# Supplementary material for: Ready-Made Bodily Sensations
Source: Research Square preprint supplement (doi:10.21203/rs.3.rs-6429051/v1), 2025-06-03
Supplement: Supplementary file [file 39183d16aabb10609fddc99f.pdf]

# Supplementary Information

## Ready-Made Bodily Sensations

Nicole Ruta<sup>1,\*</sup>, Gemma Schino<sup>2,+</sup>, Marina Iosifyan<sup>1</sup>, and Brendan Wolfe<sup>1</sup>

<sup>1</sup>School of Divinity, University of St Andrews, St Mary's College, St Andrews, KY16 9JU, Scotland

<sup>2</sup>Department of Psychology, University of Groningen, Groningen, 9712 TS, The Netherlands

\*[nvgr1@st-andrews.ac.uk](mailto:nvgr1@st-andrews.ac.uk)

<sup>+</sup>these authors contributed equally to this work

### Author's Note

Nicole Ruta <https://orcid.org/0000-0001-5300-2913>

Gemma Schino <https://orcid.org/0000-0001-5757-6359>

Marina Iosifyan <https://orcid.org/0000-0002-6617-5116>

Brendan Wolfe <https://orcid.org/0000-0001-8848-7244>

### Supplementary Information Guide:

#### Supplementary Notes

Detailed notes on data pre-processing and introduction to custom code for Bodily Sensations Maps (BSMs) visualisation

#### Supplementary Figures

Supplementary figures from S1 to S2

#### Supplementary Tables

Supplementary tables S1 to S4

#### Supplementary References

List of supplementary references of additional literature mentioned in the supplementary notes

# Supplementary Notes

## Data pre-processing and introduction to custom code for Bodily Sensations Maps (BSMs) visualisation

For this project, we collected  $xy$ -coordinates from the points representing perceived sensations (activations and deactivations) that participants placed on the blank body silhouettes. Leveraging methodologies by Schino et al. <sup>1</sup> and Nummenmaa et al. <sup>2</sup> and with the aim of providing an accessible, open-source alternative to the MATLAB approach used by Nummenmaa et al. <sup>2</sup>, we developed an R script to streamline the preprocessing of these data points and enhance the visual representation of density distributions (Ruta & Schino, 2023). The R script developed for the present research improves on the Excel-based method outlined by Schino et al. <sup>1</sup> and is freely accessible on OSF (see Additional information in the main text). The three-step process was preceded by the raw data being downloaded in CSV format from Qualtrics and then uploaded to RStudio (RStudio Team, 2020; R version 4.4.1).

The process began with the application of the 2D kernel density estimation function from the *MASS* R package <sup>4</sup>. This function, adapted from Slowikowski's code <sup>5</sup>, produces raw density measures that serve as a foundation for visual analysis. We then applied a tailored colour scheme inspired by Rennie's palette customisation approach <sup>6</sup>. This allows us to improve the visual identity, to differentiate areas of varied density and to incorporate the same colours used in previous BSMs studies for consistency and standardisation <sup>7</sup>.

The second customised function, adapted from Mallepalle et al. <sup>8</sup> and Mock's work <sup>9</sup>, enables us to estimate and compare densities across the silhouette. We processed the data to fit a polygon around high-density areas (where frequent participant markings coalesced) and colour-coded density values to reflect the concentration of clicks. The  $xy$ -coordinates define the position on the body, while the  $z$  variable denotes the density of markings in each area.

In the third and final step, we generated two separate density estimates for “activations” and “deactivations”, subtracting the deactivation density from activation density to create a nuanced dataset. This allows us to visualise embodiment responses in contrasting regions, resulting in a visually intuitive output suitable for further analysis and plotting. The BSMs generated can yield both qualitative (via visual inspection) as well as quantitative results (via frequency counts, omnibus and non-parametric test outputs, cluster analyses, and image-based analysis).

In this study, we also developed a second custom R script to identify specific body regions on the human silhouette (Head, Chest, Abdomen, Upper Limbs and Lower Limbs) and to count the number of pixels that matched the predefined colors used to generate activation and deactivation areas in the BSM images. We used the *imager* package for image processing <sup>10</sup>, *dplyr* for data manipulation <sup>11</sup>, and *writexl* to export the results to an Excel file <sup>12</sup>.

The code for the process described above is freely accessible on OSF (see ‘BSM Visualisations 2025.R’ for visualising BSMs and ‘BSM ROI Finder 2025.R’ for identifying specific body regions and counting coloured pixels).

## Supplementary References

1. Schino, G., Van Klaveren, L.-M., Gallegos González, H. G. & Cox, R. F. A. Applying bodily sensation maps to art-elicited emotions: An explorative study. *Psychol. Aesthet. Creat. Arts* **18**, 315–329 (2021).
2. Nummenmaa, L., Glerean, E., Hari, R. & Hietanen, J. K. Bodily maps of emotions. *Proc. Natl. Acad. Sci.* **111**, 646–651 (2014).
3. RStudio Team. RStudio. RStudio: Integrated Development for R. RStudio (2020).
4. Ripley, B. & Venables, B. MASS: Support Functions and Datasets for Venables and Ripley's MASS. 7.3-61 <https://doi.org/10.32614/CRAN.package.MASS> (2009).
5. Slowikowski, K. Color points by density with ggplot2. *Kamil Slowikowski - Notes* <https://slowkow.com/notes/ggplot2-color-by-density/> (2017).
6. Rennie, N. Custom colour palettes for {ggplot2}. *Jumping Rivers* <https://www.jumpingrivers.com/blog/custom-colour-palettes-for-ggplot2/> (2022).
7. García-Magariño, I., Chittaro, L. & Plaza, I. Bodily sensation maps: Exploring a new direction for detecting emotions from user self-reported data. *Int. J. Hum.-Comput. Stud.* **113**, 32–47 (2018).
8. Mallepalle, S., Yurko, R., Pelechrinis, K. & Ventura, S. L. Extracting NFL tracking data from images to evaluate quarterbacks and pass defenses. *J. Quant. Anal. Sports* **16**, 95–120 (2020).
9. Mock, T. Heatmaps in ggplot2. *The MockUp* <https://themockup.blog/posts/2020-08-28-heatmaps-in-ggplot2/> (2020).
10. Barthelme, S. imager: Image Processing Library Based on 'CImg'. 1.0.2 <https://doi.org/10.32614/CRAN.package.imager> (2015).
11. Wickham, H., François, R., Henry, L., Müller, K. & Vaughan, D. dplyr: A Grammar of Data Manipulation. 1.1.4 <https://doi.org/10.32614/CRAN.package.dplyr> (2014).
12. Ooms, J. writexl: Export Data Frames to Excel 'xlsx' Format. 1.5.1 <https://doi.org/10.32614/CRAN.package.writexl> (2017).

# Supplementary Tables

| Object Depicted | Description                                                                                                    | Retrieved From                                                         | Activity  | Image Type |
|-----------------|----------------------------------------------------------------------------------------------------------------|------------------------------------------------------------------------|-----------|------------|
| Toilet brush    | Philippe Starck (1993), <i>The Excalibur Toilet Brush</i> .                                                    | <a href="http://moma.org">moma.org</a>                                 | Cleaning  | Art        |
| Toilet brush    | Online selling ad                                                                                              | <a href="http://gts-shop.co.uk">gts-shop.co.uk</a>                     | Cleaning  | Not-Art    |
| Vacuum cleaner  | Matt Keegan (2016), <i>Have you seen my language?</i>                                                          | <a href="http://moma.org">moma.org</a>                                 | Cleaning  | Art        |
| Vacuum cleaner  | Online selling ad                                                                                              | <a href="http://expertreviews.co.uk">expertreviews.co.uk</a>           | Cleaning  | Not-Art    |
| Belt            | Matt Keegan (2016), <i>Have you seen my language?</i>                                                          | <a href="http://moma.org">moma.org</a>                                 | Dressing  | Art        |
| Belt            | Online selling ad                                                                                              | <a href="http://ebay.co.uk">ebay.co.uk</a>                             | Dressing  | Not-Art    |
| Shirt           | Rodney Graham (1993), <i>White Shirt (for Mallarmé)</i>                                                        | <a href="http://tate.org.uk">tate.org.uk</a>                           | Dressing  | Art        |
| Shirt           | Online selling ad                                                                                              | <a href="http://dimaclasses.com">dimaclasses.com</a>                   | Dressing  | Not-Art    |
| T-shirt         | Hermann Nitsch (1990), <i>Painted Shirt</i>                                                                    | <a href="http://moma.org">moma.org</a>                                 | Dressing  | Art        |
| T-shirt         | Online selling ad                                                                                              | <a href="http://cooshti.com">cooshti.com</a>                           | Dressing  | Not-Art    |
| Jeans           | Wolfgang Tillmans (1991), <i>Grey jeans over stair post</i>                                                    | <a href="http://www.guggenheim.org">www.guggenheim.org</a>             | Dressing  | Art        |
| Jeans           | AI creative suite                                                                                              | <a href="http://freepik.com">freepik.com</a>                           | Dressing  | Not-Art    |
| Coffee cup      | Stephen Shore (1972), <i>Granite, Oklahoma</i>                                                                 | <a href="http://tate.org.uk">tate.org.uk</a>                           | Drinking  | Art        |
| Coffee cup      | Online hardware development community                                                                          | <a href="http://hackaday.com">hackaday.com</a>                         | Drinking  | Not-Art    |
| Teabag          | Adolf Rambold (1949), <i>Double Chamber Tea Bag</i>                                                            | <a href="http://moma.org">moma.org</a>                                 | Drinking  | Art        |
| Teabag          | Online dictionary                                                                                              | <a href="http://dictionary.cambridge.org">dictionary.cambridge.org</a> | Drinking  | Not-Art    |
| CocaCola        | Cildo Meireles (1971), <i>Coca-Cola project</i>                                                                | <a href="http://tate.org.uk">tate.org.uk</a>                           | Drinking  | Art        |
| CocaCola        | Online selling ad                                                                                              | <a href="http://amazon.co.uk">amazon.co.uk</a>                         | Drinking  | Not-Art    |
| Milk            | Harold Eugene Edgerton (1957), <i>Milk Drop</i>                                                                | <a href="http://mitmuseum.mit.edu">mitmuseum.mit.edu</a>               | Drinking  | Art        |
| Milk            | Dairy products online                                                                                          | <a href="http://arlafoods.co.uk">arlafoods.co.uk</a>                   | Drinking  | Not-Art    |
| Bread           | Matt Keegan (2016), <i>Have you seen my language?</i>                                                          | <a href="http://moma.org">moma.org</a>                                 | Eating    | Art        |
| Bread           | Food recipes online                                                                                            | <a href="http://thespruceeats.com/">thespruceeats.com/</a>             | Eating    | Not-Art    |
| Eggs            | Matt Keegan (2016), <i>Have you seen my language?</i>                                                          | <a href="http://moma.org">moma.org</a>                                 | Eating    | Art        |
| Eggs            | Food recipes online                                                                                            | <a href="http://taste.com.au/">taste.com.au/</a>                       | Eating    | Not-Art    |
| Fork            | Matt Keegan (2016), <i>Have you seen my language?</i>                                                          | <a href="http://moma.org">moma.org</a>                                 | Eating    | Art        |
| Fork            | Free images online                                                                                             | <a href="http://pixnio.com">pixnio.com</a>                             | Eating    | Not-Art    |
| Candy           | Eyal Burstein, Michele Gauler, Beta Tank (2007), <i>Eye Candy from the Sensory Plasticity project (Models)</i> | <a href="http://moma.org">moma.org</a>                                 | Eating    | Art        |
| Candy           | Online selling ad                                                                                              | <a href="http://lorentanuts.com">lorentanuts.com</a>                   | Eating    | Not-Art    |
| Clock           | Ruth Ewan (2011), <i>We could have been anything</i>                                                           | <a href="http://tate.org.uk">tate.org.uk</a>                           | Observing | Art        |

|                |                                                                |                                                                       |                |         |
|----------------|----------------------------------------------------------------|-----------------------------------------------------------------------|----------------|---------|
|                | <i>that we wanted to be (red version)</i>                      |                                                                       |                |         |
| Clock          | Online selling ad                                              | <a href="https://www.amazon.co.uk">amazon.co.uk</a>                   | Observing      | Not-Art |
| Painting       | Stephen Shore (1972), <i>Farmington, New Mexico</i>            | <a href="https://www.metmuseum.org">metmuseum.org</a>                 | Observing      | Art     |
| Painting       | Online selling ad                                              | <a href="https://avito.ru">avito.ru</a>                               | Observing      | Not-Art |
| Plant          | Stephen Shore (1973), <i>Palm Beach, Florida</i>               | <a href="https://www.tate.org.uk">tate.org.uk</a>                     | Observing      | Art     |
| Plant          | Online selling add                                             | <a href="https://oxv-plants.com">oxv-plants.com</a>                   | Observing      | Not-Art |
| Statue         | Stephen Shore (1972) <i>Philadelphia, Pennsylvania</i>         | <a href="https://www.tate.org.uk">tate.org.uk</a>                     | Observing      | Art     |
| Statue         | Online selling ad                                              | <a href="https://avito.ru">avito.ru</a>                               | Observing      | Not-Art |
| Heart          | Robert Gober (2014-2015), <i>Heart in a box</i>                | <a href="https://www.whitney.org">whitney.org</a>                     | Observing      | Art     |
| Heart          | Online selling ad                                              | <a href="https://avito.ru">avito.ru</a>                               | Observing      | Not-Art |
| Flowers        | Urs Fischer (2011), <i>Necrophonia</i>                         | <a href="https://www.ursfischer.com">ursfischer.com</a>               | Observing      | Art     |
| Flowers        | Online selling ad                                              | <a href="https://www.roseandgrey.co.uk">roseandgrey.co.uk</a>         | Observing      | Not-Art |
| Plant          | Thomas Ruff (1979), <i>Interieur</i>                           | <a href="https://www.centrepompidou.fr">centrepompidou.fr</a>         | Observing      | Art     |
| Plant          | Gardening website                                              | <a href="https://www.balconygardenweb.com">balconygardenweb.com</a>   | Observing      | Not-Art |
| Book           | R.B. Kitaj (1972), <i>Men and Books</i>                        | <a href="https://www.tate.org.uk">tate.org.uk</a>                     | Reading        | Art     |
| Book           | Online selling ad                                              | <a href="https://www.lanntair.com">lanntair.com</a>                   | Reading        | Not-Art |
| Soap           | Robert Watts (1966), <i>Flux Lux Soap</i>                      | <a href="https://www.moma.org">moma.org</a>                           | Showering      | Art     |
| Soap           | Online selling ad                                              | <a href="https://www.thehempstore.co.uk">thehempstore.co.uk</a>       | Showering      | Not-Art |
| Toothbrush     | Robert Watts (1964), <i>Chromed Toothbrush</i>                 | <a href="https://www.moma.org">moma.org</a>                           | Showering      | Art     |
| Toothbrush     | Online selling ad                                              | <a href="https://www.genhealthcare.co.uk">genhealthcare.co.uk</a>     | Showering      | Not-Art |
| Liquid soap    | Matt Keegan (2016), <i>Have you seen my language?</i>          | <a href="https://www.moma.org">moma.org</a>                           | Showering      | Art     |
| Liquid soap    | Recipe website                                                 | <a href="https://www.thethingswellmake.com">thethingswellmake.com</a> | Showering      | Not-Art |
| Bed            | Urs Fischer (2000), <i>Bed</i>                                 | <a href="https://www.ursfischer.com">ursfischer.com</a>               | Sleeping       | Art     |
| Bed            | Online property ad                                             | <a href="https://www.rightmove.co.uk">rightmove.co.uk</a>             | Sleeping       | Not-Art |
| Pyjama         | Stephen Shore (1972), <i>New York, New York</i>                | <a href="https://www.metmuseum.org">metmuseum.org</a>                 | Sleeping       | Art     |
| Pyjama         | Online selling ad                                              | <a href="https://avito.ru">avito.ru</a>                               | Sleeping       | Not-Art |
| Shoes          | Sherrie Levine (1992), <i>2 Shoes</i>                          | <a href="https://www.tate.org.uk">tate.org.uk</a>                     | Walking        | Art     |
| Shoes          | Online selling ad                                              | <a href="https://www.chikoshoes.com">chikoshoes.com</a>               | Walking        | Not-Art |
| Boots          | Pope.L (1991), <i>Tompkins Square Crawl</i>                    | <a href="https://www.moma.org">moma.org</a>                           | Walking        | Art     |
| Boots          | Online selling ad                                              | <a href="https://avito.ru">avito.ru</a>                               | Walking        | Not-Art |
| Trainers       | Zoe Leonard (2007), <i>Analogue</i>                            | <a href="https://www.moma.org">moma.org</a>                           | Walking        | Art     |
| Trainers       | Online selling ad                                              | <a href="https://www.ebay.co.uk">ebay.co.uk</a>                       | Walking        | Not-Art |
| TV             | Mark Dickenson (1995), <i>Untitled (Clothes)</i>               | <a href="https://www.tate.org.uk">tate.org.uk</a>                     | Watching media | Art     |
| TV             | Online selling ad                                              | <a href="https://www.amazon.co.uk">amazon.co.uk</a>                   | Watching media | Not-Art |
| Computer Mouse | Steven T. Kaneko (1992), <i>Mouse Computer Pointing Device</i> | <a href="https://www.moma.org">moma.org</a>                           | Working        | Art     |
| Computer Mouse | Online news outlet                                             | <a href="https://www.telegraph.co.uk">telegraph.co.uk</a>             | Working        | Not-Art |

|          |                                                                                             |                                                            |         |         |
|----------|---------------------------------------------------------------------------------------------|------------------------------------------------------------|---------|---------|
| Computer | Jonathan Ive (2001), <i>Apple Industrial Design Group</i><br><i>Mac G4 Desktop Computer</i> | <a href="http://moma.org">moma.org</a>                     | Working | Art     |
| Computer | Wallpaper website                                                                           | <a href="http://wallpaperflare.com">wallpaperflare.com</a> | Working | Not-Art |
| Keyboard | Apple, Inc., Stephen Peart, Raymond Riley, David Shen (1993), <i>Adjustable Keyboard</i>    | <a href="http://moma.org">moma.org</a>                     | Working | Art     |
| Keyboard | Online selling ad                                                                           | <a href="http://ebay.co.uk">ebay.co.uk</a>                 | Working | Not-Art |

**Table S1.** List of images, sources and activities

| Predictors                                                      | Embodiment Score (log) |               |                  |
|-----------------------------------------------------------------|------------------------|---------------|------------------|
|                                                                 | Estimates              | CI            | <i>p</i>         |
| (Intercept)                                                     | 0.31                   | 0.26 – 0.36   | <b>&lt;0.001</b> |
| Condition [Commercial]                                          | -0.04                  | -0.10 – 0.03  | 0.272            |
| Condition [Museum]                                              | -0.02                  | -0.08 – 0.04  | 0.570            |
| Image Type [Art]                                                | 0.07                   | 0.02 – 0.13   | <b>0.009</b>     |
| Body Part [Belly]                                               | -0.32                  | -0.37 – -0.26 | <b>&lt;0.001</b> |
| Body Part [Chest]                                               | -0.14                  | -0.20 – -0.09 | <b>&lt;0.001</b> |
| Body Part [Hands]                                               | -0.12                  | -0.18 – -0.07 | <b>&lt;0.001</b> |
| Body Part [Legs]                                                | -0.53                  | -0.59 – -0.48 | <b>&lt;0.001</b> |
| Condition [Commercial] × Image Type [Art]                       | 0.00                   | -0.07 – 0.08  | 0.913            |
| Condition [Museum] × Image Type [Art]                           | 0.06                   | -0.02 – 0.13  | 0.157            |
| Condition [Commercial] × Body Part [Belly]                      | 0.01                   | -0.07 – 0.08  | 0.880            |
| Condition [Museum] × Body Part [Belly]                          | 0.03                   | -0.05 – 0.11  | 0.425            |
| Condition [Commercial] × Body Part [Chest]                      | -0.01                  | -0.09 – 0.06  | 0.778            |
| Condition [Museum] × Body Part [Chest]                          | -0.00                  | -0.08 – 0.08  | 0.980            |
| Condition [Commercial] × Body Part [Hands]                      | 0.04                   | -0.04 – 0.11  | 0.323            |
| Condition [Museum] × Body Part [Hands]                          | 0.05                   | -0.03 – 0.13  | 0.191            |
| Condition [Commercial] × Body Part [Legs]                       | 0.11                   | 0.04 – 0.19   | <b>0.004</b>     |
| Condition [Museum] × Body Part [Legs]                           | 0.09                   | 0.02 – 0.17   | <b>0.015</b>     |
| Image Type [Art] × Body Part [Belly]                            | 0.02                   | -0.06 – 0.10  | 0.598            |
| Image Type [Art] × Body Part [Chest]                            | -0.15                  | -0.23 – -0.07 | <b>&lt;0.001</b> |
| Image Type [Art] × Body Part [Hands]                            | -0.11                  | -0.19 – -0.03 | <b>0.004</b>     |
| Image Type [Art] × Body Part [Legs]                             | -0.11                  | -0.19 – -0.03 | <b>0.005</b>     |
| (Condition [Commercial] × Image Type [Art]) × Body Part [Belly] | 0.04                   | -0.07 – 0.14  | 0.501            |
| (Condition [Museum] × Image Type [Art]) × Body Part [Belly]     | -0.03                  | -0.13 – 0.08  | 0.638            |

|                                                                    |       |              |       |
|--------------------------------------------------------------------|-------|--------------|-------|
| (Condition [Commercial] × Image Type [Art])<br>× Body Part [Chest] | 0.03  | -0.08 – 0.13 | 0.634 |
| (Condition [Museum] × Image Type [Art])<br>× Body Part [Chest]     | -0.01 | -0.12 – 0.10 | 0.859 |
| (Condition [Commercial] × Image Type [Art])<br>× Body Part [Hands] | -0.01 | -0.12 – 0.10 | 0.880 |
| (Condition [Museum] × Image Type [Art])<br>× Body Part [Hands]     | -0.10 | -0.21 – 0.01 | 0.069 |
| (Condition [Commercial] × Image Type [Art])<br>× Body Part [Legs]  | -0.07 | -0.18 – 0.04 | 0.187 |
| (Condition [Museum] × Image Type [Art])<br>× Body Part [Legs]      | -0.07 | -0.18 – 0.04 | 0.209 |

#### Random Effects

|                                    |               |
|------------------------------------|---------------|
| $\sigma^2$                         | 0.56          |
| $\tau_{00 \text{ pid}}$            | 0.01          |
| $\tau_{00 \text{ img\_num}}$       | 0.00          |
| ICC                                | 0.02          |
| $N_{\text{img\_num}}$              | 34            |
| $N_{\text{pid}}$                   | 265           |
| Observations                       | 45050         |
| Marginal $R^2$ / Conditional $R^2$ | 0.055 / 0.077 |

**Table S2.** The Table above reports the results of the Mixed-Effects Model Assessing the Effect of Condition (Mixed vs Commercial vs Museum), Image Type (Art vs Not-Art), and Body Part (Head vs Chest vs Abdomen vs Upper Limbs vs Lower Limbs) on Embodiment Score. The reference level for Condition is Mixed, for Image Type is Not-Art, and for Body Part is Head. The bolded p-values are those which are statistically significant.



| Objects                                                                                                                                                                                                                                                                                                                                                                                                                                                                  | Activity                          | Frequency |
|--------------------------------------------------------------------------------------------------------------------------------------------------------------------------------------------------------------------------------------------------------------------------------------------------------------------------------------------------------------------------------------------------------------------------------------------------------------------------|-----------------------------------|-----------|
| apple, bacon, banana, biscuit, bowl, bread, breakfast, broccoli, butter, cabbage, carrots, cereal, cheese, chicken, chips, chocolate, coffee, crisps, cutlery, curry, eggs, fire, fish, flame, fork, form, fruit, ham, honey, kebab, kimchi, knife, lettuce, mach, meatballs, mug, mustard, oven, pan, pasta, peanuts, plate, porridge, potato, rice, sandwich, sausages, scampi, soup, spices, spoon, stir fry, tea, toast, tomato sauce, tomatoes, vegetables, yoghurt | Eating                            | 36        |
| bag, ball, bus, boots, coat, dog, fitness tracker, fresh, gloves, hat, hood, hoodie, jacket, jeans, keys, kindle, lead, outside, park, path, poo bags, purse, rain, scarf, school, sea front, shoes, shop, socks, sun, toddler, trainers, t-shirt, umbrella, work                                                                                                                                                                                                        | Walking                           | 27        |
| bath, bowl, cloth, conditioner, deodorant, flannel, hot water, makeup, mouthwash, shampoo, shower, shower gel, shower head, soap, toothbrush, toothpaste, towel, washing liquid, water, shaving razor                                                                                                                                                                                                                                                                    | Showering/<br>washing/<br>bathing | 18        |
| alarm, bed, blanket, dressing gown, duvet, hot water bottle, mattress, pillows, PJ, safety, tablet                                                                                                                                                                                                                                                                                                                                                                       | Sleeping                          | 14        |
| bricks, camera, chair, computer, desk, diary, dogs, earning online, headset, internet, keyboard, laptop, meetings, monitor, mouse, notebook, papers, printer, setup, smartphone, speakers, tripod                                                                                                                                                                                                                                                                        | Working                           | 13        |
| cardigan, clothes, coat, deodorant, gloves, handbag, hat, jeans, jumper, leggings, PJ, scarf, shoes, slippers, socks, sweater, trousers, t-shirt, vest, wardrobe                                                                                                                                                                                                                                                                                                         | Dressing                          | 11        |
| call the midwife, Disney, headphones, ITV, music, Netflix, podcasts, remote control, screen, smartphone, social media, sofa, speakers, spotify, twitch streams, TV                                                                                                                                                                                                                                                                                                       | Watching/<br>listening<br>media   | 11        |
| beer, coffee, coke, diluted juice, glass, mug, orange juice, pepsi, spoon, sugar, tea, water, wine                                                                                                                                                                                                                                                                                                                                                                       | Drinking                          | 10        |
| biscuit, book, bookmark, cake, chair, coffee, e-book, kindle, lamp, light, magazine, mail, online news, tablet, words                                                                                                                                                                                                                                                                                                                                                    | Reading                           | 9         |
| bins, bleach, brush, cloth, clothes, duster, dusting, Hoover, hoovering, kitchen, laundry liquid, loths, mop, polish, pressure washer, scourer, sloths, soap bar, softener, spray, steam, towels, vacuum cleaner, washing dishes, washing liquid, water, water sponge, broom                                                                                                                                                                                             | Cleaning                          | 9         |
| car, car keys, coat, diesel, my Fiesta, music, road                                                                                                                                                                                                                                                                                                                                                                                                                      | Driving                           | 9         |
| colander, crockery, fork, fresh, frying, frying pan, heat, hob, homemade, knife, microwave, olive oil, oven, pan, pepper, salt, saucepan, smell, spoon, tray, utensils, vegetables, saucepan                                                                                                                                                                                                                                                                             | Cooking                           | 8         |
| bench, earbuds, football, headphones, jump rope, leggings, music, phone, running shoes, shoes, shorts, towel, trainers, treadmill, t-shirt, water bottle, wind, weights                                                                                                                                                                                                                                                                                                  | Exercise                          | 7         |

|                                                                                                   |                 |   |
|---------------------------------------------------------------------------------------------------|-----------------|---|
| friends, mom, laptop, telephone, mobile phone                                                     | Talking         | 7 |
| chair, cushions, throws, radio, book, candy crush, TV, laptop                                     | Sitting         | 4 |
| bank card, bag, money, list                                                                       | Shopping        | 3 |
| bus, ticket, metro, bike                                                                          | Commuting       | 3 |
| cloth, machine, thread, needle, scissors                                                          | Sewing          | 2 |
| grand son, laughter, love, breakfast, cereal, bowls, spoons, toothbrush, uniform, shoes, backpack | Childcare       | 2 |
| lawn mower                                                                                        | Gardening       | 2 |
| fifa, console                                                                                     | Gaming          | 2 |
| flowers                                                                                           | Watering        | 1 |
| mirror, light, brush, pink                                                                        | Applying makeup | 1 |
| cigarette                                                                                         | Smoking         | 1 |
| excel                                                                                             | Budgeting       | 1 |

**Table S3.** The table above lists all the objects (in the Objects column) with their associated activities (in the Activity column) and the number of times each activity was mentioned in the pilot study (in the Frequency column). The top ten most frequently mentioned actions are highlighted in grey.

| Condition         | Instructions                                                                                                                                                                                                                                                                                                                                                                                                                                                                                                                                                                                                            |
|-------------------|-------------------------------------------------------------------------------------------------------------------------------------------------------------------------------------------------------------------------------------------------------------------------------------------------------------------------------------------------------------------------------------------------------------------------------------------------------------------------------------------------------------------------------------------------------------------------------------------------------------------------|
| <b>Museum</b>     | ‘In this study we investigate how people perceive contemporary art. You will see a set of images made by professional artists. They were exhibited in contemporary art galleries all over the world, including Tate Modern in London and the Museum of Modern Art in New York. All artworks you will see represent the found art. Found art is art created from everyday life objects or products that are not normally considered materials from which art is made, often because they already have a non-art function. By choosing the object and repositioning or joining, signing it, the found object became art.’ |
| <b>Commercial</b> | ‘In this study we investigate product perception. You will see a set of images made for sale online. These images represent both new and used products. Some images you will see are made by companies which sell brand new products online, including furniture, food, medical items, clothing and others. Some products were photographed by people who wish to sell used items online on a website like ebay.co.uk’                                                                                                                                                                                                  |
| <b>Mixed</b>      | ‘In this study we investigate image perception. You will see a set of images. Some of them were made by professional artists or by people for sale online. Images made by the artists were exhibited in contemporary art galleries all over the world, including Tate Modern in London and the Museum of Modern Art in New York. Images made by people represent both new and used products for sale.’                                                                                                                                                                                                                  |

**Table S3.** The table above reports the specific instructions provided to participants in each condition (museum, commercial, and mixed) to induce a distinct cognitive stance.

# Supplementary Figures

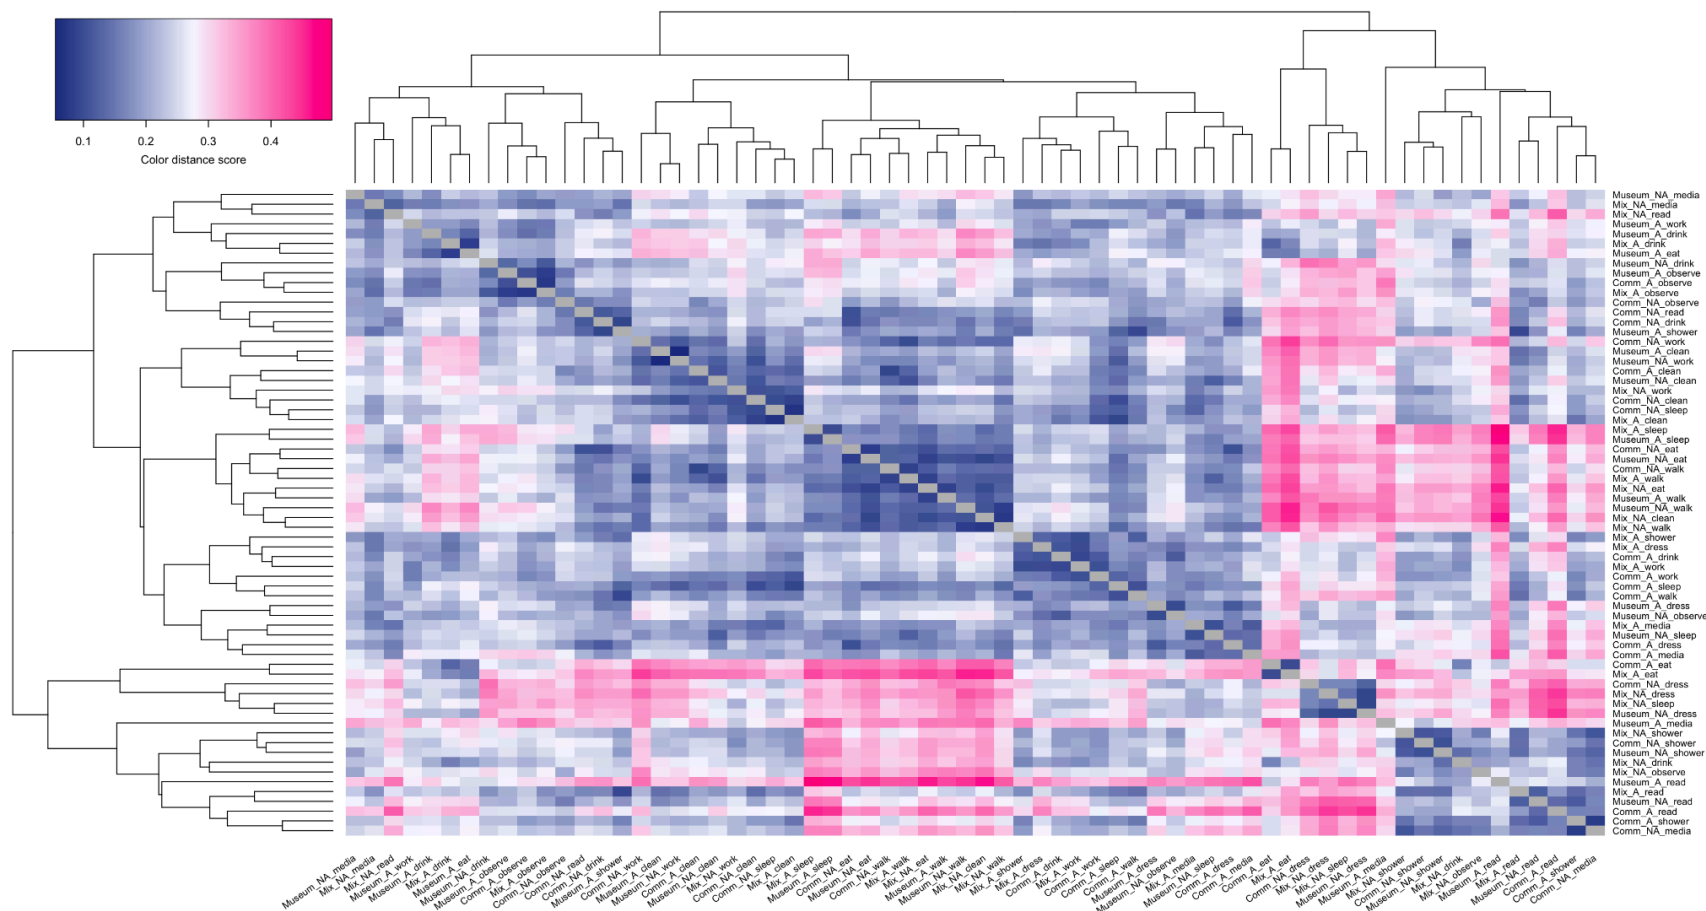

**Figure S1.** Distance matrix of colour (dis)similarity for BSMs across all levels of Conditions, Image Type, and Activities.

*Note.* Comm = Commercial; Museum = Museum; Mix = Mixed; A = Art; NA = Not-Art;

eat = eating; walk = walking; sleep = sleeping; work = working; shower = showering; dress = dressing; media = watching media, drink = drinking; read = reading; clean = cleaning; dress = dressing; observe = observing

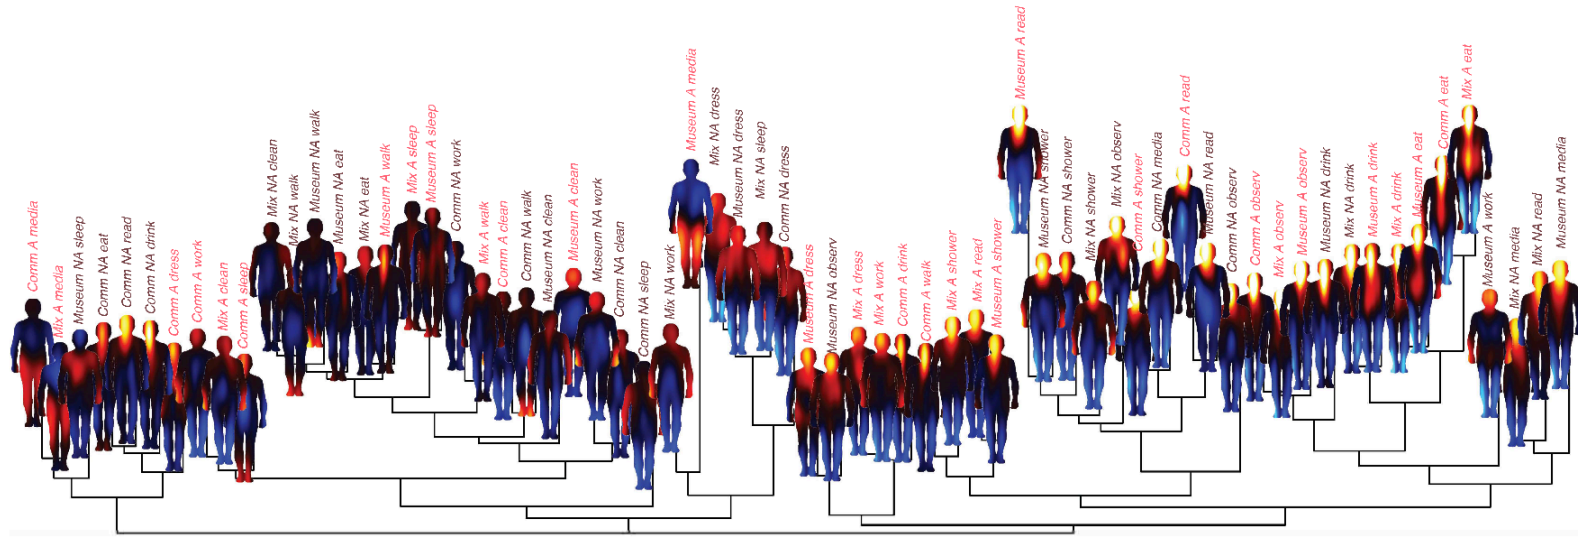

**Figure S2.** Clustering Tree of BSMs across Conditions, Image Type, and Activities

*Note.* Comm = Commercial; Museum = Museum; Mix = Mixed; A = Art (light red); NA = Not-Art (dark red); eat = eating; walk = walking; sleep = sleeping; work = working; shower = showering; dress = dressing; media = watching media; drink = drinking; read = reading; clean = cleaning; dress = dressing; observe = observing
